# Supplementary material
Source: Springer Nature journal article supplement (https://www.springermedizin.de/resource/supplementary/12958_2007_397_MOESM5_ESM.pdf/9567794)

**A**

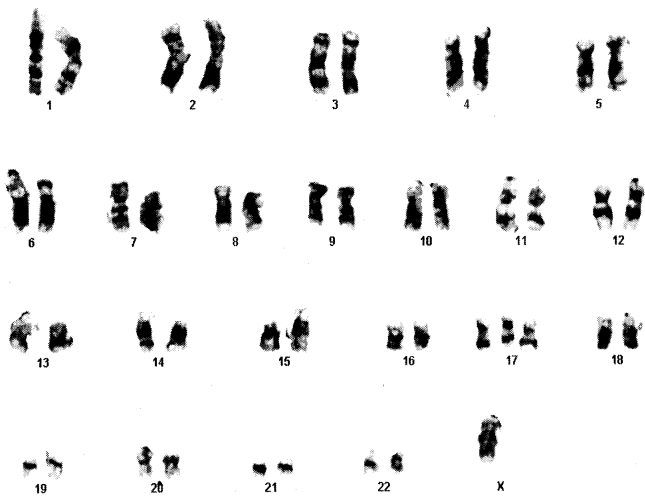

**B**

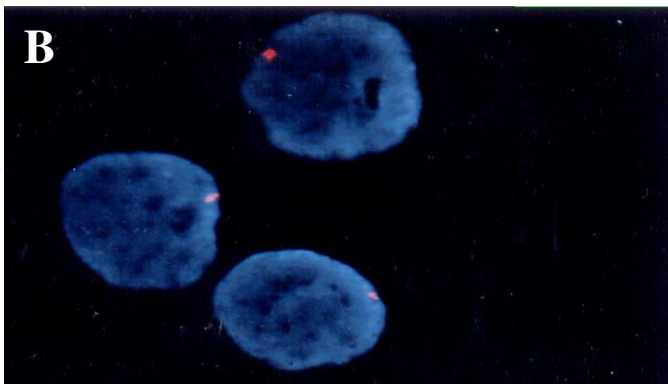

**C**

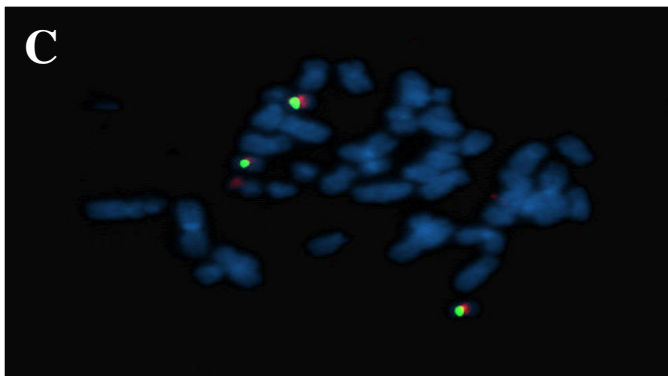

Supplement: MOESM5 [file 9567794]
